# Supplementary material
Source: PubMed Central journal article supplement (PMC3749508)
Supplement: ismej201374x2.pdf [file ismej201374x2.pdf]

Supplementary Table 1

## TRANSCRIPTOMICS

## UP-regulated

| Locus Tag      | Gene Object ID | ID Description                                   | EC Number | COG  | Group | Functional Categories                                             |
|----------------|----------------|--------------------------------------------------|-----------|------|-------|-------------------------------------------------------------------|
| ObacDRAFT_1002 | 641180481      | ATP synthase F1, alpha subunit                   | 3.6.3.14  | 0056 | C     | Energy production and conversion                                  |
| ObacDRAFT_2008 | 641183125      | NADH-ubiquinone/plastoquinone oxidoreductase     | 1.6.5.3   | 0839 | C     | Energy production and conversion                                  |
| ObacDRAFT_4074 | 641180385      | Quinone oxidoreductase putative PIG3             | 1.6.5.5   | 0604 | CR    | Energy production and conversion/General function prediction only |
| ObacDRAFT_3725 | 641183128      | putative exopolysaccharide biosynthesis protein  | N/A       | 0489 | D     | Cell cycle control, cell division, chromosome partitioning        |
| ObacDRAFT_1474 | 641182918      | ABC transporter related                          | N/A       | 0410 | E     | Amino acid transport and metabolism                               |
| ObacDRAFT_3647 | 641182410      | D-isomer specific 2-hydroxyacid dehydrogenase    | 1.1.1.95  | 0111 | E     | Amino acid transport and metabolism                               |
| ObacDRAFT_1038 | 641183406      | phosphofructokinase                              | 2.7.1.11  | 0205 | G     | Carbohydrate transport and metabolism                             |
| ObacDRAFT_1367 | 641181180      | Fructose-bisphosphate aldolase                   | 4.1.2.13  | 0191 | G     | Carbohydrate transport and metabolism                             |
| ObacDRAFT_3927 | 641181225      | Alpha/beta hydrolase fold-3 domain protein       | 3.7.1.-   | 0657 | I     | Lipid transport and metabolism                                    |
| ObacDRAFT_2695 | 641182545      | ribosomal protein L15                            | N/A       | 0200 | J     | Translation, ribosomal structure and biogenesis                   |
| ObacDRAFT_1498 | 641183640      | lysyl-tRNA synthetase                            | 6.1.1.6   | 1190 | J     | Translation, ribosomal structure and biogenesis                   |
| ObacDRAFT_3158 | 641182322      | regulatory protein LacI                          | N/A       | 1609 | K     | Transcription                                                     |
| ObacDRAFT_1903 | 641180891      | regulatory protein GntR HTH                      | N/A       | 1609 | K     | Transcription                                                     |
| ObacDRAFT_3386 | 641180148      | helix-turn-helix- domain containing protein AraC | N/A       | 2207 | K     | Transcription                                                     |
| ObacDRAFT_3083 | 641183638      | DNA-directed DNA polymerase                      | 2.7.7.7   | 0389 | L     | Replication, recombination and repair                             |
| ObacDRAFT_1380 | 641183673      | exodeoxyribonuclease VII, small subunit          | 3.1.11.6  | 1722 | L     | Replication, recombination and repair                             |
| ObacDRAFT_3711 | 641182838      | integrase family protein                         | N/A       | 4974 | L     | Replication, recombination and repair                             |
| ObacDRAFT_3566 | 641180943      | major facilitator superfamily MFS_1              | N/A       | 2223 | P     | Inorganic ion transport and metabolism                            |
| ObacDRAFT_0993 | 641180470      | Acetyl xylan esterase                            | N/A       | 3458 | Q     | Secondary metabolites biosynthesis, transport and catabolism      |
| ObacDRAFT_0729 | 641183105      | integral membrane sensor signal transduction     | 2.7.13.3  | 0642 | T     | Signal transduction mechanisms                                    |
| ObacDRAFT_1492 | 641181088      | type II and III secretion system protein         | N/A       | 1450 | U     | Intracellular trafficking, secretion, and vesicular transport     |
| ObacDRAFT_0510 | 641180714      | type II secretion system protein                 | N/A       | 1459 | U     | Intracellular trafficking, secretion, and vesicular transport     |
| ObacDRAFT_2682 | 641181536      | export protein FliQ family 3                     | N/A       | 1987 | U     | Intracellular trafficking, secretion, and vesicular transport     |
| ObacDRAFT_2604 | 641182131      | WD40 domain protein beta Propeller               | N/A       | 0823 | U     | Intracellular trafficking, secretion, and vesicular transport     |
| ObacDRAFT_2168 | 641183701      | TPR repeat-containing protein                    | N/A       | N/A  | N/A   |                                                                   |
| ObacDRAFT_1988 | 641181411      | Inner membrane CreD family protein               | N/A       | 4452 | V     | Defense mechanisms                                                |
| ObacDRAFT_2832 | 641180795      | ISRSO5-transposase protein                       | N/A       | N/A  |       |                                                                   |
| ObacDRAFT_1479 | 641182388      | regulatory protein LacI                          |           |      |       |                                                                   |
| ObacDRAFT_2532 | 641181909      | regulatory protein LacI                          |           |      |       |                                                                   |
| ObacDRAFT_3485 | 641183617      | helix-turn-helix- domain containing protein AraC |           |      |       |                                                                   |
| ObacDRAFT_2379 | 641179917      | hypothetical protein                             |           |      |       |                                                                   |
| ObacDRAFT_3770 | 641180523      | hypothetical protein                             |           |      |       |                                                                   |
| ObacDRAFT_4115 | 641182554      | hypothetical protein                             |           |      |       |                                                                   |
| ObacDRAFT_2467 | 641180041      | hypothetical protein                             |           |      |       |                                                                   |
| ObacDRAFT_0304 | 641180335      | protein of unknown function DUF147               |           |      |       |                                                                   |
| ObacDRAFT_0671 | 641182958      | conserved hypothetical protein                   |           |      |       |                                                                   |
| ObacDRAFT_0198 | 641179730      | hypothetical protein                             |           |      |       |                                                                   |
| ObacDRAFT_2291 | 641180546      | hypothetical protein                             |           |      |       |                                                                   |
| ObacDRAFT_2505 | 641181167      | hypothetical protein                             |           |      |       |                                                                   |
| ObacDRAFT_0172 | 641182653      | hypothetical protein                             |           |      |       |                                                                   |
| ObacDRAFT_0891 | 641181281      | hypothetical protein                             |           |      |       |                                                                   |
| ObacDRAFT_1818 | 641182755      | hypothetical protein                             |           |      |       |                                                                   |
| ObacDRAFT_2387 | 641179929      | hypothetical protein                             |           |      |       |                                                                   |
| ObacDRAFT_2703 | 641182547      | hypothetical protein                             |           |      |       |                                                                   |
| ObacDRAFT_2603 | 641182130      | protein of unknown function DUF59                |           |      |       |                                                                   |

|                |                                                |
|----------------|------------------------------------------------|
| ObacDRAFT_3299 | 641183335 hypothetical protein                 |
| ObacDRAFT_0149 | 641180431 hypothetical protein                 |
| ObacDRAFT_2383 | 641179922 hypothetical protein                 |
| ObacDRAFT_1681 | 641182784 Uncharacterized protein-like protein |

#### DOWN-regulated

|                |                                                                    |          |      |   |                                                 |
|----------------|--------------------------------------------------------------------|----------|------|---|-------------------------------------------------|
| ObacDRAFT_3488 | 641183430 Beta-glucosidase                                         | 3.2.1.21 | 2723 | G | Carbohydrate transport and metabolism           |
| ObacDRAFT_2780 | 641182885 acetylglutamate kinase                                   | 2.7.2.8  | 0548 | E | Amino acid transport and metabolism             |
| ObacDRAFT_1952 | 641183714 Pyrroline-5-carboxylate reductase                        | 1.5.1.2  | 0345 | E | Amino acid transport and metabolism             |
| ObacDRAFT_1865 | 641180361 Ribulose-phosphate 3-epimerase                           | 5.1.3.1  | 0036 | G | Carbohydrate transport and metabolism           |
| ObacDRAFT_3182 | 641183345 sugar-phosphate isomerase, RpiB/LacA/LacB                | 5.3.1.6  | 0698 | G | Carbohydrate transport and metabolism           |
| ObacDRAFT_3215 | 641183152 2-amino-4-hydroxy-6-hydroxymethylidihydropteridine pyrop | 2.7.6.3  | 0801 | H | Coenzyme transport and metabolism               |
| ObacDRAFT_3157 | 641182327 biotin--acetyl-CoA-carboxylase ligase                    | 6.3.4.15 | 0340 | H | Coenzyme transport and metabolism               |
| ObacDRAFT_2424 | 641182974 GCN5-related N-acetyltransferase                         | N/A      | 1670 | J | Translation, ribosomal structure and biogenesis |
| ObacDRAFT_1590 | 641182699 translation elongation factor Ts                         | N/A      | 0264 | J | Translation, ribosomal structure and biogenesis |
| ObacDRAFT_0988 | 641181375 helix-turn-helix- domain containing protein AraC         | N/A      | 2207 | K | Transcription                                   |
| ObacDRAFT_2322 | 641183407 transcriptional regulator, LysR family                   | N/A      | 0583 | K | Transcription                                   |
| ObacDRAFT_0045 | 641182511 DNA-directed DNA polymerase                              | 2.7.7.7  | 0847 | K |                                                 |
| ObacDRAFT_1223 | 641181018 Methyltransferase type 12                                | N/A      | N/A  |   |                                                 |
| ObacDRAFT_3212 | 641183546 hypothetical protein                                     |          |      |   |                                                 |
| ObacDRAFT_2769 | 641181319 hypothetical protein                                     |          |      |   |                                                 |
| ObacDRAFT_2328 | 641182819 hypothetical protein                                     |          |      |   |                                                 |
| ObacDRAFT_2044 | 641179849 hypothetical protein                                     |          |      |   |                                                 |
| ObacDRAFT_0797 | 641181333 hypothetical protein                                     |          |      |   |                                                 |
| ObacDRAFT_0711 | 641181999 conserved hypothetical protein                           |          |      |   |                                                 |
| ObacDRAFT_3441 | 641181152 hypothetical protein                                     |          |      |   |                                                 |
| ObacDRAFT_2130 | 641180866 hypothetical protein                                     |          |      |   |                                                 |
| ObacDRAFT_0819 | 641179783 conserved hypothetical protein                           |          |      |   |                                                 |
| ObacDRAFT_2414 | 641181788 hypothetical protein                                     |          |      |   |                                                 |
| ObacDRAFT_0265 | 641180554 hypothetical protein                                     |          |      |   |                                                 |
| ObacDRAFT_4102 | 641180409 hypothetical protein                                     |          |      |   |                                                 |
| ObacDRAFT_0241 | 641179761 hypothetical protein                                     |          |      |   |                                                 |

#### PROTEOMICS

##### UP-regulated

| Locus Tag      | Gene Object ID | ID Description                                           | EC Number | COG  | Group | Functional Categories               |
|----------------|----------------|----------------------------------------------------------|-----------|------|-------|-------------------------------------|
| ObacDRAFT_3061 | 641182673      | aldo/keto reductase                                      | N/A       | 0667 | C     | Energy production and conversion    |
| ObacDRAFT_1943 | 641182117      | D-lactate dehydrogenase (cytochrome)                     | 1.1.3.15  | 0277 | C     | Energy production and conversion    |
| ObacDRAFT_2903 | 641182424      | FGGY-family pentulose kinase                             | 2.7.1.16  | 1069 | C     | Energy production and conversion    |
| ObacDRAFT_1327 | 641181096      | Phosphoenolpyruvate carboxykinase (GTP)                  | 4.1.1.32  | 1274 | C     | Energy production and conversion    |
| ObacDRAFT_2731 | 641180635      | succinate dehydrogenase and fumarate reductase iron-sul  | 1.3.99.1  | 0479 | C     | Energy production and conversion    |
| ObacDRAFT_2730 | 641180634      | succinate dehydrogenase or fumarate reductase, flavoprot | 1.3.5.4   | 1053 | C     | Energy production and conversion    |
| ObacDRAFT_2013 | 641181659      | ferredoxin                                               | 1.6.5.3   | 1143 | C     | Energy production and conversion    |
| ObacDRAFT_2017 | 641181663      | NADH dehydrogenase (ubiquinone) 30 kDa subunit           | 1.6.5.3   | 0852 | C     | Energy production and conversion    |
| ObacDRAFT_2887 | 641182650      | Alanine--glyoxylate transaminase                         | 2.6.1.-   | 0075 | E     | Amino acid transport and metabolism |
| ObacDRAFT_0053 | 641181674      | Glutamate dehydrogenase (NADP(+))                        | 1.4.1.4   | 0334 | E     | Amino acid transport and metabolism |
| ObacDRAFT_1864 | 641180360      | lipolytic protein G-D-S-L family                         |           | 2755 | E     | Amino acid transport and metabolism |

|                |           |                                                                            |          |      |   |                                                               |
|----------------|-----------|----------------------------------------------------------------------------|----------|------|---|---------------------------------------------------------------|
| ObacDRAFT_0053 | 641181674 | glutamate synthase, NADH/NADPH, small subunit                              | 1.4.1.13 | 0493 | E | Amino acid transport and metabolism                           |
| ObacDRAFT_0782 | 641181325 | ROK family protein                                                         | 2.7.1.63 | 1940 | G | Carbohydrate transport and metabolism                         |
| ObacDRAFT_1414 | 641181838 | glyceraldehyde-3-phosphate dehydrogenase, type I                           | 1.2.1.12 | 0057 | G | Carbohydrate transport and metabolism                         |
| ObacDRAFT_1969 | 641182248 | glycogen/starch synthase, ADP-glucose type                                 | 2.4.1.21 | 0297 | G | Carbohydrate transport and metabolism                         |
| ObacDRAFT_2426 | 641181843 | glycoside hydrolase family 2 TIM barrel                                    | 3.2.1.23 | 3250 | G | Carbohydrate transport and metabolism                         |
| ObacDRAFT_3988 | 641181601 | phosphofructokinase                                                        | 2.7.1.11 | 0205 | G | Carbohydrate transport and metabolism                         |
| ObacDRAFT_0714 | 641182004 | pyruvate, phosphate dikinase                                               | 2.7.9.1  | 0574 | G | Carbohydrate transport and metabolism                         |
| ObacDRAFT_1412 | 641181836 | Triose-phosphate isomerase                                                 | 5.3.1.1  | 149  | G | Carbohydrate transport and metabolism                         |
| ObacDRAFT_3012 | 641180254 | Xylose isomerase domain protein TIM barrel                                 | 5.3.1.5  | 1082 | G | Carbohydrate transport and metabolism                         |
| ObacDRAFT_1973 | 641182252 | Xylose isomerase domain protein TIM barrel                                 |          |      |   |                                                               |
| ObacDRAFT_0419 | 641182902 | Xylose isomerase domain protein TIM barrel                                 |          |      |   |                                                               |
| ObacDRAFT_2850 | 641182487 | TonB-dependent receptor plug                                               | N/A      | 4206 | H | Coenzyme transport and metabolism                             |
| ObacDRAFT_3600 | 641182497 | biotin/lipoyl attachment domain-containing protein                         | N/A      | 0511 | I | Lipid transport and metabolism                                |
| ObacDRAFT_2918 | 641181729 | glutaminyl-tRNA synthetase                                                 | 6.1.1.18 | 0008 | J | Translation, ribosomal structure and biogenesis               |
| ObacDRAFT_2699 | 641182550 | ribosomal protein S11                                                      | N/A      | 0100 | J | Translation, ribosomal structure and biogenesis               |
| ObacDRAFT_1703 | 641181809 | translation elongation factor G                                            | 3.6.5.3  | 0480 | J | Translation, ribosomal structure and biogenesis               |
| ObacDRAFT_2586 | 641183246 | tryptophanyl-tRNA synthetase                                               | 6.1.1.2  | 0180 | J | Translation, ribosomal structure and biogenesis               |
| ObacDRAFT_3342 | 641180098 | two component transcriptional regulator, LuxR family                       | N/A      | 2197 | K |                                                               |
| ObacDRAFT_3586 | 641182162 | DNA mismatch repair protein MutS domain protein                            | N/A      | 0249 | L | Replication, recombination and repair                         |
| ObacDRAFT_0959 | 641182396 | twitching motility protein                                                 | N/A      | 2805 | N | Cell motility                                                 |
| ObacDRAFT_1758 | 641181629 | ATPase AAA-2 domain protein                                                | N/A      | 0542 | O | Posttranslational modification, protein turnover, chaperones  |
| ObacDRAFT_1710 | 641182761 | ferric uptake regulator, Fur family                                        | N/A      | 0735 | P | Inorganic ion transport and metabolism                        |
| ObacDRAFT_1220 | 641181014 | phosphopantetheine-binding                                                 | N/A      | 0236 | Q | Secondary metabolites biosynthesis, transport and catabolism  |
| ObacDRAFT_1706 | 641181812 | 2,5-didehydrogluconate reductase                                           | N/A      | 0656 | R | General function prediction only                              |
| ObacDRAFT_0445 | 641181248 | band 7 protein                                                             | N/A      | 2268 | S | Function unknown                                              |
| ObacDRAFT_0605 | 641181912 | putative CRISPR-associated protein, APE2256 family                         |          | 4006 | S | Function unknown                                              |
| ObacDRAFT_1966 | 641183420 | SecA Wing and Scaffold                                                     | N/A      | 0653 | U | Intracellular trafficking, secretion, and vesicular transport |
| ObacDRAFT_3531 | 641180213 | Tetratricopeptide TPR_2 repeat protein                                     |          | 5010 | U | Intracellular trafficking, secretion, and vesicular transport |
| ObacDRAFT_2613 | 641183326 | TPR repeat-containing protein                                              |          |      |   |                                                               |
| ObacDRAFT_1558 | 641181288 | Nucleotidyl transferase                                                    | 2.7.7.8  | N/A  |   |                                                               |
| ObacDRAFT_3338 | 641180094 | hypothetical protein ObacDRAFT_3338                                        |          |      |   |                                                               |
| ObacDRAFT_2602 | 641182983 | conserved hypothetical protein                                             |          |      |   |                                                               |
| ObacDRAFT_3954 | 641181565 | conserved hypothetical protein                                             |          |      |   |                                                               |
| ObacDRAFT_1126 | 641180760 | hypothetical protein ObacDRAFT_1126                                        |          |      |   |                                                               |
| ObacDRAFT_0266 | 641180556 | hypothetical protein ObacDRAFT_0266                                        |          |      |   |                                                               |
| ObacDRAFT_4041 | 641183491 | hypothetical protein ObacDRAFT_4041                                        |          |      |   |                                                               |
| ObacDRAFT_3315 | 641181266 | conserved hypothetical protein                                             |          |      |   |                                                               |
| ObacDRAFT_1965 | 641183567 | conserved hypothetical protein-signal peptide and transmembrane prediction |          |      |   |                                                               |
| ObacDRAFT_3500 | 641182172 | protein of unknown function DUF303 acylesterase putative                   |          |      |   |                                                               |
| ObacDRAFT_1489 | 641181085 | hypothetical protein ObacDRAFT_1489                                        |          |      |   |                                                               |
| ObacDRAFT_3940 | 641181463 | hypothetical protein ObacDRAFT_3940                                        |          |      |   |                                                               |
| ObacDRAFT_1245 | 641182420 | conserved hypothetical protein                                             |          |      |   |                                                               |
| ObacDRAFT_1015 | 641183098 | protein of unknown function DUF303 acylesterase putative                   |          |      |   |                                                               |
| ObacDRAFT_1491 | 641181087 | hypothetical protein ObacDRAFT_1491                                        |          |      |   |                                                               |

#### DOWN-regulated

|                |           |                                              |          |      |   |                                |
|----------------|-----------|----------------------------------------------|----------|------|---|--------------------------------|
| ObacDRAFT_3556 | 641183484 | 6-phosphogluconate dehydrogenase NAD-binding | 1.1.1.44 | 2084 | I | Lipid transport and metabolism |
|----------------|-----------|----------------------------------------------|----------|------|---|--------------------------------|

|                |           |                                                  |          |      |   |                                                              |
|----------------|-----------|--------------------------------------------------|----------|------|---|--------------------------------------------------------------|
| ObacDRAFT_0038 | 641183259 | uridylylate kinase                               | 2.7.4.22 | 0528 | F | Nucleotide transport and metabolism                          |
| ObacDRAFT_1019 | 641181412 | Adenosylhomocysteinase                           | 4.4.1.21 | 0499 | H | Coenzyme transport and metabolism                            |
| ObacDRAFT_1018 | 641183101 | Methionine adenosyltransferase                   | 2.5.1.6  | 0192 | H | Coenzyme transport and metabolism                            |
| ObacDRAFT_2307 | 641183495 | acetate--CoA ligase                              | 6.2.1.1  | 0365 | I | Lipid transport and metabolism                               |
| ObacDRAFT_4010 | 641180594 | FeS assembly protein SufB                        | N/A      | 0719 | O | Posttranslational modification, protein turnover, chaperones |
| ObacDRAFT_2287 | 641180534 | Hpt protein                                      | N/A      | 2198 | T | Signal transduction mechanisms                               |
| ObacDRAFT_1073 | 641181950 | cell surface receptor IPT/TIG domain protein     | N/A      | N/A  |   |                                                              |
| ObacDRAFT_2744 | 641182035 | Uncharacterized protein-like protein             |          |      |   |                                                              |
| ObacDRAFT_1288 | 641183076 | conserved repeat domain                          |          |      |   |                                                              |
| ObacDRAFT_1612 | 641180499 | hypothetical protein ObacDRAFT_1612              |          |      |   |                                                              |
| ObacDRAFT_3883 | 641181926 | protein of unknown function DUF306 Meta and HslJ |          |      |   |                                                              |
| ObacDRAFT_4012 | 641180596 | protein of unknown function DUF59                |          |      |   |                                                              |
