# Supplementary material
Source: PubMed Central journal article supplement (PMC3749508)

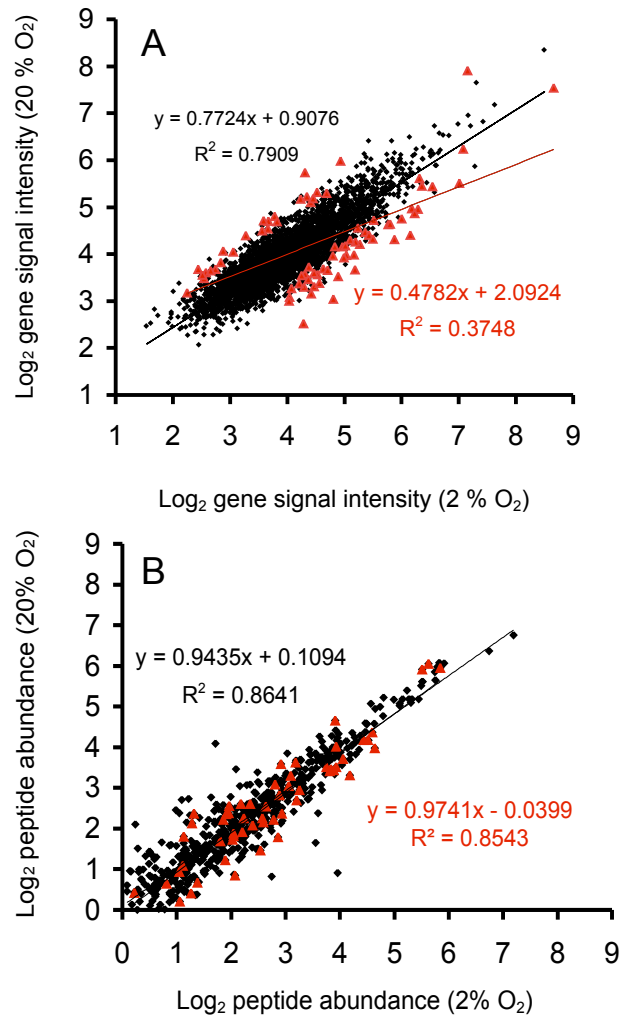

Supplementary Figure 1

Supplement: ismej201374x1.pdf [file ismej201374x1.pdf]
